# Supplementary material for: Color-tunable persistent luminescence hybrid materialsviaradiative energy transfer
Source: Royal Society of Chemistry journal article supplement (doi:10.1039/d2ma00327a), 2022-01-01
Supplement: d2ma00327a1.pdf [file d2ma00327a1.pdf]

## Supporting Information

# Color-Tunable of Persistent Luminescent Hybrid Materials by Radiative Energy Transfer

Dan zhao <sup>a,b,c,d,e</sup>, Lijun Song <sup>a,b,d,e\*</sup>, Jinlei Li<sup>a,b,d,e</sup>, Fenglong Lin<sup>a,b,d,e</sup>, Shenglong Wang<sup>a,b,d,e</sup>, Yincai Wu<sup>a,b,d,e</sup>,  
Fulin Lin<sup>a,b,d,e</sup>, Xinkun Wang<sup>a,b,d,e</sup>

<sup>a</sup> *Fujian Science & Technology Innovation Laboratory for Optoelectronic Information of China, Fuzhou 350002, China*

<sup>b</sup> *Xiamen Institute of Rare Earth Materials, Haixi Institute, Chinese Academy of Sciences, Xiamen 361021, China*

<sup>c</sup> *College of chemical Engineering, Fuzhou University, Fuzhou, Fujian, 350108, China*

<sup>d</sup> *CAS Key Laboratory of Design and Assembly of Functional Nanostructures, and Fujian Key Laboratory of Nanomaterials, Fujian Institute of Research on the Structure of Matter, Chinese Academy of Sciences, Fuzhou, Fujian 350002, China*

<sup>e</sup> *Xiamen Key Laboratory of Rare Earth Photoelectric Functional Materials, Chinese Academy of Sciences, Xiamen 361021, China*

*\* Corresponding authors*

*Email address: slj@fjirsm.ac.cn*

## Table of contents

### 1. Additional Figures and Tables

**Figure S1.** Afterglow decay curve of SA<sub>2</sub>O<sub>4</sub>/PFD sample 1 after being irradiated for 15 min under 365 nm UV light and the fitting curve of sample 1.

**Figure S2.** The energy transfer efficiency  $\eta_{ET}$  curve of the composite film (1#-14#).

**Table S1.** The energy transfer efficiency  $\eta_{ET}$  of the composite film (1#-14#).

### 2. References

## 1. Additional Figures and Tables

The afterglow decay process of composite film consists of a fast decay process and a slow decay part, which well-fitted into a third-order exponential function<sup>1</sup>:

$$I(t) = A_1 \exp\left\{-\frac{t}{\tau_1}\right\} + A_2 \exp\left\{-\frac{t}{\tau_2}\right\} + A_3 \exp\left\{-\frac{t}{\tau_3}\right\} + I_0$$

Here,  $I(t)$  and  $I_0$  are the phosphorescence intensities at time  $t$  and 0,  $A_1$ ,  $A_2$  and  $A_3$  are constants,  $t$  is time, and  $\tau_1$ ,  $\tau_2$ , and  $\tau_3$  are the decay times.

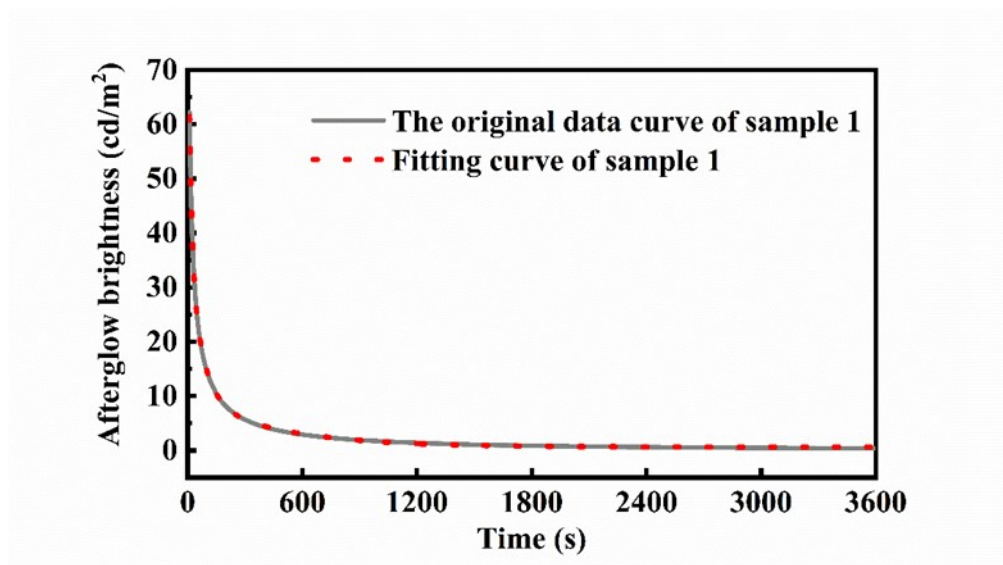

**Figure S1.** Afterglow decay curve of SA<sub>2</sub>O<sub>4</sub>/PFD sample 1 after being irradiated for 15 min under 365 nm UV light and the fitting curve of sample 1.

After fitting the curves for all samples, we calculate the corresponding average lifetime of the entire fluorescence decay process, the formula is as follows:

$$\langle \tau \rangle = \frac{B_1 \tau_1^2 + B_2 \tau_2^2 + B_3 \tau_3^2}{B_1 \tau_1 + B_2 \tau_2 + B_3 \tau_3}$$

The energy transfer efficiency  $\eta_{ET}$  can be estimated as follows<sup>2</sup>:

$$\eta_{ET} = 1 - \tau_f / \tau_o$$

where the  $\tau_f$  is the average lifetime of composite film with different PFD added, and  $\tau_0$  is the average lifetime of corresponding composite film with only phosphors added. The energy transfer efficiency  $\eta_{ET}$  of the composite film are summarized in Table S1, and the specific data are shown in Figure S2.

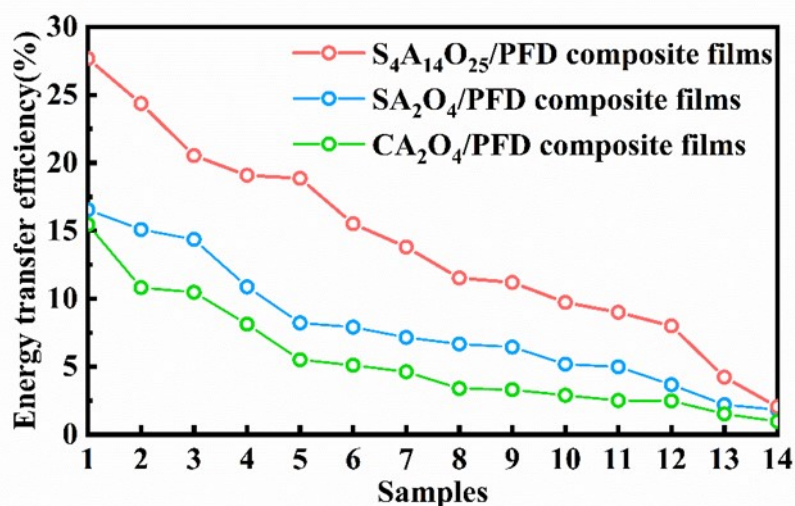

**Figure S2.** The energy transfer efficiency  $\eta_{ET}$  curve of the composite film (1#-14#).

**Table S1.** The energy transfer efficiency  $\eta_{ET}$  of the composite film (1#-14#).

| Energy transfer efficiency       | 1#   | 2#   | 3#   | 4#   | 5#   | 6#   | 7#   | 8#   | 9#   | 10# | 11# | 12# | 13# | 14# |
|----------------------------------|------|------|------|------|------|------|------|------|------|-----|-----|-----|-----|-----|
| $\eta_{ET}(SA_2O_4/PFD)$         | 16.5 | 15.1 | 14.4 | 10.8 | 8.2  | 7.9  | 7.1  | 6.7  | 6.4  | 5.2 | 5.0 | 3.7 | 2.2 | 1.8 |
| $\eta_{ET}(S_4A_{14}O_{25}/PFD)$ | 27.7 | 24.4 | 20.5 | 19.1 | 18.9 | 15.5 | 13.8 | 11.5 | 11.2 | 9.7 | 9.0 | 8.0 | 4.2 | 2.1 |
| $\eta_{ET}(CA_2O_4/PFD)$         | 15.5 | 10.8 | 10.5 | 8.1  | 5.5  | 5.1  | 4.6  | 3.4  | 3.1  | 2.9 | 2.5 | 2.4 | 1.5 | 1.0 |

## 2. References

(1) Chen Z, Luo L, Li Y, et al. Warm-toned SiO<sub>2</sub>/red-emitting color converter@SrAl<sub>2</sub>O<sub>4</sub>:Eu<sup>2+</sup>, Dy<sup>3+</sup> luminous fibers with variable and color-tuned luminescence on the basis of radiative energy transfer and color conversion[J]. Journal of Luminescence, 2019, 216: 116756.

(2) Yi, Luo, Zhi guo, et al. Effect of Al/Ga Substitution on Photoluminescence and Phosphorescence Properties of Garnet-Type  $Y_3Sc_2Ga_{3-x}Al_xO_{12}:Ce^{3+}$  Phosphor[J]. The Journal of Physical Chemistry C, 2014, 118(40):23297-23305.
